# Supplementary material for: Modeling Modulation of the Tick Regulome in Response to Anaplasma phagocytophilum for the Identification of New Control Targets
Source: Front Physiol. 2019 Apr 18;10:462. doi: 10.3389/fphys.2019.00462 (PMC6482211; doi:10.3389/fphys.2019.00462)
Supplement: Supplementary file 2 [file Table_2.XLSX]

## Sheet: ISE6 cells
Supplementary Dataset 2. In silico modulation of tick regulome in ISE6 cells in response to A. phagocytophilum infection.
Type	ID	Response to infection	Description	Biological process (level-3 GO annotations)		DNA binding sequence	Reference
TF	ISCW006446	Present only in infected cells	Pituitary homeobox (Hox)	Multicellular organism development	Development	nTAATn	PMID: 7911971
TF	ISCW007820	Present only in infected cells	Heat shock transcription factor (HSF)	Stress response	Stress response	nGAAn	PMID: 28852220
TF	ISCW021026	Present only in infected cells	Transcription factor Ap-2	Regulation of cell proliferation	Cell proliferation	GCCn3GGC	PMID: 2010091
TF	ISCW021207	Present only in infected cells	Homeobox protein Arx	Transcriptional repressor and activator. Multicellular organism development	Development	nTAATn	PMID: 22252899
Gene	ISCW003836	Up	Carboxypeptidase inhibitor precursor	Endopeptidase inhibitor. Blood coagulation	Peptidase inhibitor	Multiple nGAAn, tTAATt (67260-67265), aTAATa (67380-67385)	DS729026
Gene	ISCW004372	Up	Uncharacterized protein	Sterol biosynthetic process	Metabolism	Multiple nGAAn, aTAATa (560-565)	DS722051
Gene	ISCW004493	Up	Uncharacterized protein	DNA binding transcription factor activity	Transcription	Multiple nGAAn, aTAATt (197880-197885)	DS722357
Gene	ISCW004650	Up	G-protein coupled octopamine receptor	Histamine receptor	Receptor	Multiple nGAAn, GCCtgcGGC (11231-11239), tTAATa (47380-47385)	DS718929
Gene	ISCW005112	Up	Uncharacterized protein	Cell cycle arrest (cyclin-dependent protein serine/threonine kinase inhibitor activity)	Cell proliferation	Multiple nGAAn	DS702840
Gene	ISCW005228	Up	Uncharacterized protein	Endopeptidase inhibitor.	Peptidase inhibitor	Multiple nGAAn, Multiple nTAATn	DS730936
Gene	ISCW005544	Up	Cytochrome P450	Heme binding	Heme binding	Multiple nGAAn, Multiple nTAATn	DS749836
Gene	ISCW006506	Up	Protein kinase	Intracellular signal transduction	Signal transduction	Multiple nGAAn, GCCacgGGC (31741-31749), Multiple nTAATn	DS732683
Gene	ISCW006697	Up	Glycine receptor alpha 1 variant	Transmembrane signaling	Signal transduction	Multiple nGAAn, gTAATg (319599-319605)	DS759009
Gene	ISCW008052	Up	Dachshund	regulation of transcription, DNA-templated. multicellular organism development	Transcription	Multiple nGAAn, GCCaagGGC (145791-145799), Multiple nTAATn	DS799054
Gene	ISCW008667	Up	Secreted salivary gland peptide	Endopeptidase inhibitor	Peptidase inhibitor	Multiple nGAAn, aTAATa (25889-25895)	DS814907
Gene	ISCW009619	Up	CDKl1/4	Protein phosphorylation (cyclin-dependent protein serine/threonine kinase activity)	Metabolism	Multiple nGAAn, tTAATt (89979-89985)	DS831824
Gene	ISCW009661	Up	Serine/threonine protein kinase	Intracellular signal transduction	Signal transduction	Multiple nGAAn	DS838048
Gene	ISCW010213	Up	Tyrosine/tryptophan monooxygenase	Aromatic amino acid family metabolic process	Metabolism	Multiple nGAAn,gTAATTAATg (8256-8265)	DS828545
Gene	ISCW011771	Up	Cystatin	Endopeptidase inhibitor	Peptidase inhibitor	Multiple nGAAn	DS879707
Gene	ISCW012363	Up	Secreted salivary gland peptide	Endopeptidase inhibitor	Peptidase inhibitor	Multiple nGAAn, cTAATt (29460-29465)	DS913033
Gene	ISCW013254	Up	D-amino acid oxidase	D-amino acid metabolic process	Metabolism	Multiple nGAAn	DS899492
Gene	ISCW014321	Up	Glutamate-gated chloride channel	Chloride transmembrane transport	Metabolism	Multiple nGAAn, tTAATa (13730-13735)	DS938791
Gene	ISCW014959	Up	Phospholipase A2 precursor	Phospholipid metabolic process	Metabolism	Multiple nGAAn, GCCtccGGC (127-531-127539)	DS932253
Gene	ISCW016732	Up	Translation factor GUF1 homolog, mitochondrial	Positive regulation of translation. Promotes mitochondrial protein synthesis	Mitochondrial function	Multiple nGAAn, cTAATt (281790-281795), tTAATa (282140-282145)	DS656447
Gene	ISCW017508	Up	Serine/threonine-protein phosphatase	Detection of stimulus involved in sensory perception	Sensory perception	tTAATg (213510-213515)	DS674345
Gene	ISCW017946	Up	Uncharacterized protein	Regulation of transcription, DNA-templated	Transcription	Multiple nGAAn	DS731648
Gene	ISCW018603	Up	Salivary cystatin-L	Endopeptidase inhibitor. Inhibits host immune responses via its inhibition of host cathepsins	Peptidase inhibitor	Multiple nGAAn, cTAATa (94140-94145), gTAATc (94200-94205)	DS737013
Gene	ISCW018818	Up	Peroxinectin	Response to oxidative stress	Stress response	Multiple nGAAn, GCCaggGGC (15431-15439), cTAATc (18870-18875)	DS762500
Gene	ISCW019584	Up	Glutathione peroxidase	Response to oxidative stress	Stress response	Multiple nGAAn, GCCtctGGC (53161-53169)	DS798279
Gene	ISCW020085	Up	Uncharacterized protein	Response to oxidative stress	Stress response	Multiple nGAAn	DS819318
Gene	ISCW020718	Up	POU domain protein	regulation of transcription by RNA polymerase II	Transcription	Multiple nGAAn	DS850108
Gene	ISCW020916	Up	Growth factor independence	Regulation of transcription	Transcription	Multiple nGAAn	DS889418
Gene	ISCW020918	Up	Zinc finger protein	Regulation of transcription. hemopoiesis	Transcription	Multiple nGAAn, GCCccgGGC (42051-42059), aTAATt (99710-99715)	DS889418
Gene	ISCW021415	Up	Serpin-2 precursor	Endopeptidase inhibitor	Peptidase inhibitor	Multiple nGAAn	DS866317
Gene	ISCW022626	Up	Glutamate-gated chloride channel	Chloride transmembrane transport	Transport	Multiple nGAAn, GCCgacGGC (22981-22989)	DS911923
Gene	ISCW024387	Up	Serpin-2 precursor	Endopeptidase inhibitor	Peptidase inhibitor	cGAAa (270-275)	DS751394
Gene	ISCW024396	Up	Secreted protein	Metabolic process	Metabolism	Multiple nGAAn	DS765275
Gene	ISCW024410	Up	Kunitz-type proteinase inhibitor 5 II	Endopeptidase inhibitor	Peptidase inhibitor	Multiple nGAAn, tTAATc (240-245), tTAATc (280-285)	DS767061
Gene	ISCW024528	Up	Cystatin-2	Endopeptidase inhibitor	Peptidase inhibitor	None found	DS813472
TF	ISCW008705	Down	RNA polymerase II transcription factor complex	Regulation of transcription by RNA polymerase II	Transcription
TF	ISCW010324	Down	Helix-loop-helix protein hen	Regulation of transcription by RNA polymerase II	Transcription
TF	ISCW012614	Down	Iroquois-class homeobox protein IRX	Regulation of transcription, DNA templated	Transcription
TF	ISCW015819	Down	Retinal homeobox protein	Multicellular organism development	Development
Gene	ISCW000229	Down	Copper type II, ascorbate-dependent monooxygenase	Dopamine catabolic process	Metabolism
Gene	ISCW000649	Down	Peptidyl-prolyl cis-trans isomerase	Regulation of apoptotic process	Apoptosis
Gene	ISCW000710	Down	Microtubule-associated proteins 1A/1B light chain	Autophagy of mitochondrion. Cellular response to nitrogen starvation	Mitochondrial function
Gene	ISCW001624	Down	Uncharacterized protein	DNA binding transcription factor	Transcription
Gene	ISCW002036	Down	Cystatin	Cysteine-type endopeptidase inhibitor	Peptidase inhibitor
Gene	ISCW002204	Down	Homogentisate 1,2-dioxygenase	Tyrosine metabolic process	Metabolism
Gene	ISCW002528	Down	Oxidase/peroxidase	Response to oxidative stress	Stress response
Gene	ISCW003231	Down	Uncharacterized protein	Phosphorelay sensor	Signal transduction
Gene	ISCW003334	Down	Beta-1 subunit of nicotinic acetylcholine receptor	Transmembrane signaling receptor	Signal transduction
Gene	ISCW003494	Down	Cathepsin C	Immune response	Immune response
Gene	ISCW003862	Down	Serine proteinase inhibitor	Serine-type endopeptidase inhibitor	Peptidase inhibitor
Gene	ISCW003967	Down	Fatty acyl-CoA reductase	Lipid metabolic process	Metabolism
Gene	ISCW004892	Down	Sugar transporter	Glucose import	Transport
Gene	ISCW004944	Down	Ligand-gated ion channel subunit	Transmembrane transport	Transport
Gene	ISCW005236	Down	Voltage-activated ion channel	Regulation of membrane potential	Membrane potential
Gene	ISCW005558	Down	Membrane glycoprotein LIG-1	Cytokine-mediated signaling pathway. negative regulation of JAK-STAT cascade	Signal transduction
Gene	ISCW005601	Down	G protein-coupled receptor	Phospholipase C-activating G-protein coupled receptor signaling pathway	Signal transduction
Gene	ISCW005909	Down	GATA zinc finger domaincontaining protein	Cell differentiation	Cell proliferation
Gene	ISCW006618	Down	Gamma-aminobutyric-acid receptor	Chloride transmembrane transport	Transport
Gene	ISCW006863	Down	Uncharacterized protein	Response to oxidative stress	Stress response
Gene	ISCW007163	Down	Proline dehydrogenase	Proline catabolic process to glutamate	Metabolism
Gene	ISCW007164	Down	3 hydroxysteroid dehydrogenase	Steroid biosynthetic process	Metabolism
Gene	ISCW007546	Down	Nicotinic acetylcholine receptor subunit dalpha6, dalpha7	Transmembrane signaling receptor	Signal transduction
Gene	ISCW007589	Down	DMRT1	DNA binding transcription factor	Transcription
Gene	ISCW007727	Down	Toll	Signal transduction	Signal transduction
Gene	ISCW008055	Down	Dachshund	Regulation of transcription, DNA-templated	Transcription
Gene	ISCW009256	Down	Nuclear receptor	Transcription, DNA-templated	Transcription
Gene	ISCW009648	Down	Galanin receptor 2/3	G-protein coupled receptor	Receptor
Gene	ISCW009857	Down	Fatty acyl-CoA reductase	Lipid metabolic process	Metabolism
Gene	ISCW010422	Down	Serpin-2 precursor	Serine-type endopeptidase inhibitor	Peptidase inhibitor
Gene	ISCW010916	Down	Glutamate-gated chloride channel	Transmembrane signaling receptor	Signal transduction
Gene	ISCW011017	Down	Serpin-2 precursor	Serine-type endopeptidase inhibitor	Peptidase inhibitor
Gene	ISCW011096	Down	Adenylate and guanylate cyclase	Intracellular signal transduction	Signal transduction
Gene	ISCW011454	Down	KUN-1	Serine-type endopeptidase inhibitor	Peptidase inhibitor
Gene	ISCW012152	Down	Uncharacterized protein	Regulation of transcription, DNA-templated	Transcription
Gene	ISCW012411	Down	ATP-dependent DNA helicase	DNA replication	Replication
Gene	ISCW012503	Down	Multidrug resistance protein	Transmembrane transport	Transport
Gene	ISCW013058	Down	Serine/threonine protein kinase	Intracellular signal transduction	Signal transduction
Gene	ISCW013262	Down	Acireductone dioxygenase	Methionine metabolic process	Metabolism
Gene	ISCW014100	Down	Serpin	Protease inhibitor	Peptidase inhibitor
Gene	ISCW014347	Down	Animal-type fatty acid synthase	Biosynthetic process	Metabolism
Gene	ISCW014462	Down	Prolyl 4-hydroxylase alpha subunit	Collagen synthesis	Metabolism
Gene	ISCW014747	Down	Secreted salivary gland peptide	Serine-type endopeptidase inhibitor	Peptidase inhibitor
Gene	ISCW015198	Down	Serpin-2	Serine-type endopeptidase inhibitor	Peptidase inhibitor
Gene	ISCW015769	Down	Prolyl 4-hydroxylase alpha subunit	Collagen synthesis	Metabolism
Gene	ISCW016718	Down	Monooxygenase	Ubiquinone biosynthetic process	Metabolism
Gene	ISCW016721	Down	DNA Mismatch Repair (MMR) protein MutS	Mismatch repair	Replication
Gene	ISCW017368	Down	Oxidase/peroxidase	Response to oxidative stress	Stress response
Gene	ISCW017836	Down	Uncharacterized protein	Synaptic vesicle endocytosis	Transport
Gene	ISCW017907	Down	Dynein light chain	Transport along microtubule	Transport
Gene	ISCW018436	Down	TBC domaincontaining protein	Intracellular protein transport	Transport
Gene	ISCW018984	Down	G-protein coupled receptor	Phospholipase C-activating G-protein coupled receptor signaling pathway	Signal transduction
Gene	ISCW021060	Down	Antennapedia	Regulation of transcription, DNA-templated	Transcription
Gene	ISCW021362	Down	ELK channel	Regulation of membrane potential	Membrane potential
Gene	ISCW021631	Down	Bone morphogenetic protein	Cell development	Development
Gene	ISCW021819	Down	Uncharacterized protein	Regulation of transcription, DNA-templated	Transcription
Gene	ISCW021954	Down	Malate dehydrogenase	Carbohydrate metabolic process	Metabolism
Gene	ISCW021955	Down	Malate dehydrogenase	Carbohydrate metabolic process	Metabolism
Gene	ISCW022352	Down	ABC transporter	Transmembrane transport	Transport
Gene	ISCW023235	Down	Protein sine oculis	Regulation of transcription, DNA-templated	Transcription
Gene	ISCW023373	Down	V-type proton ATPase subunit a	Vacuolar proton-transport	Transport
Gene	ISCW024109	Down	Serpin 7 precursor	Serine-type endopeptidase inhibitor	Peptidase inhibitor
Gene	ISCW024368	Down	Atrial natriuretic peptide receptor	Intracellular signal transduction	Signal transduction
Gene	ISCW024480	Down	Dynein light chain	Transport along microtubule	Transport
Gene	ISCW024692	Down	5' nucleotidase	Regulation of translation	Translation
Gene	ISCW024710	Down	Secreted protein	Regulation of cell growth	Cell proliferation
Gene	ISCW024812	Down	Cytochrome C oxidase polypeptide VIII	Mitochondrial respiratory chain	Mitochondrial function
Gene	ISCW024906	Down	Serine protease inhibitor	Serine-type endopeptidase inhibitor	Peptidase inhibitor
