# Supplementary material for: Modeling Modulation of the Tick Regulome in Response to Anaplasma phagocytophilum for the Identification of New Control Targets
Source: Front Physiol. 2019 Apr 18;10:462. doi: 10.3389/fphys.2019.00462 (PMC6482211; doi:10.3389/fphys.2019.00462)
Supplement: Supplementary file 3 [file Table_3.XLSX]

## Sheet: ISE6 cells
Supplementary Dataset 3. Data for TF obtained from the network constructs in I. scapularis ISE6 cells, fed adult female midguts and salivary glands.
TF	Infected	Uninfected	BNC	PR	weighted degree		BNC	PR	weighted degree
ISCW008705	0	1.07737					17.1987	0.825709	8.61896
ISCW015819	0	0.0436381					93.4872	0.998255	0.436381
ISCW010324	0	0.0473598					17.1987	0.825709	0.378878
ISCW012614	0	0.792461					17.1987	0.825709	6.33969
ISCW007308	0	0.0271493					0	0.299851	0.027149
ISCW006445	0	0.209444					0	0.299851	0.209444
ISCW008247	0	0.102874					0	0.299851	0.102874
ISCW022440	0	0.0223147					0	0.299851	0.022315
ISCW020093	0	0.125987					0	0.299851	0.125987
ISCW002094	0	0.217534					0	0.299851	0.217534
ISCW021817	0.0171289	0.00755633	93.7119	1.00958	0.171289		93.4872	0.998255	0.075563
ISCW017545	0.0276793	0.0254167	2.65084	0.375182	0.055359		2.29485	0.375986	0.050833
ISCW015766	0.0389616	0.145053	0	0.299048	0.038962		0	0.299851	0.145053
ISCW007820	0.0483678	0	19.7215	0.82479	0.386942
ISCW009607	0.0574171	0.0201209	0	0.299048	0.057417		0	0.299851	0.020121
ISCW021026	0.0630042	0	38.6788	0.908394	0.567038
ISCW015765	0.0639525	0.177453	19.7215	0.82479	0.51162		17.1987	0.825709	1.41962
ISCW018243	0.0689428	0.0966017	62.1637	0.98701	0.689428		61.4951	0.983899	0.966017
ISCW016444	0.0695438	0.576807	0	0.299048	0.069544		0	0.299851	0.576807
ISCW003951	0.0829503	0.0830417	62.1637	0.98701	0.829503		61.4951	0.983899	0.830417
ISCW021207	0.0857617	0	39.0621	0.483834	0.257285
ISCW008920	0.0865865	0	0	0.299048	0.086586
ISCW019706	0.0931271	0.362863	0	0.299048	0.093127		0	0.299851	0.362863
ISCW009634	0.0934769	0.0492068	0	0.299048	0.093477		0	0.299851	0.049207
ISCW006446	0.102753	0	39.0621	0.483834	0.308259
ISCW010527	0.189385	0.119528	62.1637	0.98701	1.89385		61.4951	0.983899	1.19528
ISCW015767	0.191999	0.599758	19.7215	0.82479	1.53599		17.1987	0.825709	4.79806
ISCW001161	0.198954	0.244449	62.1637	0.98701	1.98954		61.4951	0.983899	2.44449
ISCW006493	0.203746	0.683713	0	0.299048	0.203746		0	0.299851	0.683713
ISCW007030	0.212849	0.0539023	0	0.299048	0.212849		0	0.299851	0.053902
ISCW017713	0.282014	0.43214	0	0.299048	0.282014		0	0.299851	0.43214
ISCW021480	0.30738	1.00598	62.1637	0.98701	3.0738		61.4951	0.983899	10.0598
ISCW007040	0.33352	0.772606	19.7215	0.82479	2.66816		17.1987	0.825709	6.18085
ISCW014989	0.354594	1.92161	0	0.299048	0.354594		0	0.299851	1.92161
ISCW018799	0.37143	2.32609	19.7215	0.82479	2.97144		17.1987	0.825709	18.6087
ISCW004992	0.372023	0.700681	0	0.299048	0.372023		0	0.299851	0.700681
ISCW017712	0.384296	0.617648	39.0621	0.483834	1.15289		44.1662	0.472397	1.85294
ISCW005275	0.385407	0.632585	0	0.299048	0.385407		0	0.299851	0.632585
ISCW013710	0.413398	0.495829	19.7215	0.82479	3.30718		17.1987	0.825709	3.96663
ISCW016573	0.447685	0.190152	0	0.299048	0.447685		0	0.299851	0.190152
ISCW018031	0.452163	0.754685	0	0.299048	0.452163		0	0.299851	0.754685
ISCW021090	0.46696	0.870766	0	0.299048	0.46696		0	0.299851	0.870766
ISCW019892	0.514916	0.390273	0	0.299048	0.514916		0	0.299851	0.390273
ISCW011251	0.528605	0.454129	19.7215	0.82479	4.22884		17.1987	0.825709	3.63303
ISCW012144	0.533756	0.714972	0	0.299048	0.533756		0	0.299851	0.714972
ISCW005496	0.595397	0.470568	0	0.299048	0.595397		0	0.299851	0.470568
ISCW018149	0.690034	0.648892	0	0.299048	0.690034		0	0.299851	0.648892
ISCW021042	0.700425	1.13508	0	0.299048	0.700425		0	0.299851	1.13508
ISCW003697	0.709103	5.37488	0	0.299048	0.709103		0	0.299851	5.37488
ISCW021524	0.716499	0.924986	0	0.299048	0.716499		0	0.299851	0.924986
ISCW023105	0.745967	0.597198	19.7215	0.82479	5.96774		17.1987	0.825709	4.77758
ISCW000973	0.804426	1.25193	120	1.08819	8.84869		120.062	1.07668	13.7712
ISCW002341	1.00017	1.34508	0	0.299048	1.00017		0	0.299851	1.34508
ISCW019282	1.02437	1.95812	0	0.299048	1.02437		0	0.299851	1.95812
ISCW011969	1.03435	2.72714	42.7322	0.903406	9.30915		40.7856	0.904134	24.5443
ISCW017801	1.15539	1.49107	0	0.299048	1.15539		0	0.299851	1.49107
ISCW009030	1.32579	2.36056	19.7215	0.82479	10.6063		17.1987	0.825709	18.8845
ISCW016268	1.51668	3.11519	62.1637	0.98701	15.1668		61.4951	0.983899	31.1519
ISCW003667	1.52869	3.18812	0	0.299048	1.52869		0	0.299851	3.18812
ISCW023383	1.701	3.43818	0	0.299048	1.701		0	0.299851	3.43818
ISCW015741	1.7324	3.50722	19.7215	0.82479	13.8592		17.1987	0.825709	28.0578
ISCW001025	1.80672	1.57169	0	0.299048	1.80672		0	0.299851	1.57169
ISCW003096	1.94778	7.75886	93.7119	1.00958	19.4778		93.4872	0.998255	77.5886
ISCW002484	2.09491	3.94817	19.7215	0.82479	16.7593		17.1987	0.825709	31.5854
ISCW018939	2.18796	2.61369	0	0.299048	2.18796		0	0.299851	2.61369
ISCW014430	2.26253	3.98575	0	0.299048	2.26253		0	0.299851	3.98575
ISCW014431	2.26253	3.98575	0	0.299048	2.26253		0	0.299851	3.98575
ISCW005223	2.68564	3.59719	0	0.299048	2.68564		0	0.299851	3.59719
ISCW022557	2.78374	2.38001	19.7215	0.82479	22.2699		17.1987	0.825709	19.0401
ISCW017688	2.94809	2.66321	19.7215	0.82479	23.5847		17.1987	0.825709	21.3057
ISCW003694	3.222	9.84067	0	0.299048	3.222		0	0.299851	9.84067
ISCW023660	3.25016	7.37405	72.9539	0.983257	32.5016		71.5584	0.984206	73.7405
ISCW023657	3.25016	7.37405	0	0.299048	3.25016		0	0.299851	7.37405
ISCW024267	3.57217	2.72506	0	0.299048	3.57217		0	0.299851	2.72506
ISCW016537	3.59443	6.86016	19.7215	0.82479	28.7554		17.1987	0.825709	54.8813
ISCW023842	3.60071	3.41126	0	0.299048	3.60071		0	0.299851	3.41126
ISCW023841	3.60071	3.41126	0	0.299048	3.60071		0	0.299851	3.41126
ISCW013371	4.00608	6.98912	62.1637	0.98701	40.0608		61.4951	0.983899	69.8912
ISCW019520	4.15546	7.61037	0	0.299048	4.15546		0	0.299851	7.61037
ISCW001024	4.25367	2.38728	0	0.299048	4.25367		0	0.299851	2.38728
ISCW015737	4.26146	5.05202	19.7215	0.82479	34.0917		17.1987	0.825709	40.4162
ISCW020503	4.53572	7.95567	0	0.299048	4.53572		0	0.299851	7.95567
ISCW020504	4.53572	7.95567	0	0.299048	4.53572		0	0.299851	7.95567
ISCW012145	4.59123	1.3017	0	0.299048	4.59123		0	0.299851	1.3017
ISCW015937	4.61385	6.81132	62.1637	0.98701	46.1385		61.4951	0.983899	68.1132
ISCW011755	4.68476	4.23346	93.7119	1.00958	46.8476		93.4872	0.998255	42.3346
ISCW003256	5.08041	3.54822	19.7215	0.82479	40.6433		17.1987	0.825709	28.3858
ISCW010095	5.18914	5.97831	0	0.299048	5.18914		0	0.299851	5.97831
ISCW024566	5.52553	6.85897	0	0.299048	5.52553		0	0.299851	6.85897
ISCW021079	5.56019	7.86169	19.7215	0.82479	44.4815		17.1987	0.825709	62.8935
ISCW021080	5.56019	7.86169	0	0.299048	5.56019		0	0.299851	7.86169
ISCW007968	5.77366	7.54782	0	0.299048	5.77366		0	0.299851	7.54782
ISCW022561	5.8168	7.47497	0	0.299048	5.8168		0	0.299851	7.47497
ISCW009436	5.96667	7.06824	0	0.299048	5.96667		0	0.299851	7.06824
ISCW000227	6.06969	8.9084	19.7215	0.82479	48.5575		17.1987	0.825709	71.2672
ISCW016455	6.08634	6.68608	0	0.299048	6.08634		0	0.299851	6.68608
ISCW011469	6.12315	6.33749	0	0.299048	6.12315		0	0.299851	6.33749
ISCW008954	6.12754	0	0	0.299048	6.12754
ISCW011188	6.34819	6.7982	19.7215	0.82479	50.7855		17.1987	0.825709	54.3856
ISCW000457	6.42547	7.94676	0	0.299048	6.42547		0	0.299851	7.94676
ISCW020265	6.87022	11.3924	0	0.299048	6.87022		0	0.299851	11.3924
ISCW017749	6.95394	10.4108	19.7215	0.82479	55.6315		17.1987	0.825709	83.2864
ISCW021517	7.06988	8.50627	0	0.299048	7.06988		0	0.299851	8.50627
ISCW000551	7.69606	10.5427	13.7776	0.674698	46.1764		11.9838	0.675584	63.2562
ISCW020472	7.7282	10.3916	0	0.299048	7.7282		0	0.299851	10.3916
ISCW010061	7.81839	13.9742	0	0.299048	7.81839		0	0.299851	13.9742
ISCW019692	8.01021	10.578	19.7215	0.82479	64.0817		17.1987	0.825709	84.624
ISCW013570	8.64872	20.432	0	0.299048	8.64872		0	0.299851	20.432
ISCW008805	8.90095	10.8491	19.7215	0.82479	71.2076		17.1987	0.825709	86.7928
ISCW021054	9.07518	12.5608	0	0.299048	9.07518		0	0.299851	12.5608
ISCW022714	9.55469	11.4485	0	0.299048	9.55469		0	0.299851	11.4485
ISCW015036	9.81729	12.3155	19.7215	0.82479	78.5383		17.1987	0.825709	98.524
ISCW022115	9.97985	11.2412	0	0.299048	9.97985		0	0.299851	11.2412
ISCW003529	10.1397	10.4743	0	0.299048	10.1397		0	0.299851	10.4743
ISCW019283	10.1445	17.5615	19.7215	0.82479	81.156		17.1987	0.825709	140.492
ISCW019280	10.1445	17.5615	19.7215	0.82479	81.156		17.1987	0.825709	140.492
ISCW011796	11.4857	17.2291	72.9539	0.983257	114.857		71.5584	0.984206	172.291
ISCW011795	11.4857	17.2291	0	0.299048	11.4857		0	0.299851	17.2291
ISCW021939	11.505	8.57219	19.7215	0.82479	92.04		17.1987	0.825709	68.5775
ISCW012211	12.144	14.5199	13.7776	0.674698	72.864		11.9838	0.675584	87.1194
ISCW012210	12.144	14.5199	0	0.299048	12.144		0	0.299851	14.5199
ISCW023060	12.5361	11.7292	0	0.299048	12.5361		0	0.299851	11.7292
ISCW017122	12.8696	19.1035	19.7215	0.82479	102.957		17.1987	0.825709	152.828
ISCW000140	12.9479	14.166	72.9539	0.983257	129.479		71.5584	0.984206	141.66
ISCW018164	13.9081	14.1178	19.7215	0.82479	111.265		17.1987	0.825709	112.942
ISCW021770	13.973	13.6537	0	0.299048	13.973		0	0.299851	13.6537
ISCW023000	13.9849	18.9665	19.7215	0.82479	111.879		17.1987	0.825709	151.732
ISCW005790	14.5844	15.8673	0	0.299048	14.5844		0	0.299851	15.8673
ISCW023999	14.8536	21.2832	0	0.299048	14.8536		0	0.299851	21.2832
ISCW019861	15.0395	13.6741	0	0.299048	15.0395		0	0.299851	13.6741
ISCW002976	15.2611	18.1779	62.1637	0.98701	152.611		61.4951	0.983899	181.779
ISCW020450	15.2886	29.3974	19.7215	0.82479	122.309		17.1987	0.825709	235.179
ISCW011271	15.996	24.1474	19.7215	0.82479	127.968		17.1987	0.825709	193.179
ISCW023432	16.0066	19.5717	0	0.299048	16.0066		0	0.299851	19.5717
ISCW002346	16.052	17.7003	0	0.299048	16.052		0	0.299851	17.7003
ISCW002347	16.052	17.7003	0	0.299048	16.052		0	0.299851	17.7003
ISCW017832	16.1923	19.4336	62.1637	0.98701	161.923		61.4951	0.983899	194.336
ISCW007299	16.8199	17.7147	19.7215	0.82479	134.559		17.1987	0.825709	141.718
ISCW022843	17.6493	16.5223	0	0.299048	17.6493		0	0.299851	16.5223
ISCW021083	17.9178	70.865	0	0.299048	17.9178		0	0.299851	70.865
ISCW018935	19.1443	25.2806	72.9539	0.983257	191.443		71.5584	0.984206	252.806
ISCW010253	19.4578	20.3481	19.7215	0.82479	155.662		17.1987	0.825709	162.785
ISCW018997	19.8692	19.8581	0	0.299048	19.8692		0	0.299851	19.8581
ISCW006922	19.9256	25.704	0	0.299048	19.9256		0	0.299851	25.704
ISCW000718	20.0124	19.9543	16.7619	0.748655	140.087		14.6024	0.749575	139.68
ISCW021579	20.174	18.6075	19.7215	0.82479	161.392		17.1987	0.825709	148.86
ISCW009440	20.6778	36.1306	93.7119	1.00958	206.778		93.4872	0.998255	361.306
ISCW008375	21.0926	21.7989	0	0.299048	21.0926		0	0.299851	21.7989
ISCW015893	21.422	28.2862	0	0.299048	21.422		0	0.299851	28.2862
ISCW007431	21.8288	24.9847	19.7215	0.82479	174.63		17.1987	0.825709	199.878
ISCW020204	23.4709	29.0353	0	0.299048	23.4709		0	0.299851	29.0353
ISCW004924	25.0481	20.4472	0	0.299048	25.0481		0	0.299851	20.4472
ISCW007296	26.2997	25.6452	0	0.299048	26.2997		0	0.299851	25.6452
ISCW005631	27.8916	24.1772	19.7215	0.82479	223.133		17.1987	0.825709	193.418
ISCW008923	29.9269	19.0569	19.7215	0.82479	239.415		17.1987	0.825709	152.455
ISCW017821	31.9018	36.2349	19.7215	0.82479	255.214		17.1987	0.825709	289.879
ISCW017872	32.2787	32.521	0	0.299048	32.2787		0	0.299851	32.521
ISCW004234	34.8791	39.6524	72.9539	0.983257	348.791		71.5584	0.984206	396.524
ISCW003976	36.2858	33.5851	0	0.299048	36.2858		0	0.299851	33.5851
ISCW023474	40.5221	55.7846	62.1637	0.98701	405.221		61.4951	0.983899	557.846
ISCW019222	41.0759	49.5562	19.7215	0.82479	328.607		17.1987	0.825709	396.45
ISCW022584	42.0777	31.1963	0	0.299048	42.0777		0	0.299851	31.1963
ISCW000384	42.5225	44.6769	19.7215	0.82479	340.18		17.1987	0.825709	357.415
ISCW021143	43.0058	33.9541	0	0.299048	43.0058		0	0.299851	33.9541
ISCW000010	43.562	44.2364	19.7215	0.82479	348.496		17.1987	0.825709	353.891
ISCW013477	47.1519	51.0819	19.7215	0.82479	377.215		17.1987	0.825709	408.655
ISCW006276	47.6922	39.8336	0	0.299048	47.6922		0	0.299851	39.8336
ISCW016540	50.1043	71.0678	19.7215	0.82479	400.834		17.1987	0.825709	568.542
ISCW018168	51.3446	67.7296	0	0.299048	51.3446		0	0.299851	67.7296
ISCW012531	51.6314	54.8634	0	0.299048	51.6314		0	0.299851	54.8634
ISCW021323	53.6496	48.4894	19.7215	0.82479	429.197		17.1987	0.825709	387.915
ISCW016614	54.0093	58.0286	19.7215	0.82479	432.074		17.1987	0.825709	464.229
ISCW023283	56.5723	65.8479	0	0.299048	56.5723		0	0.299851	65.8479
ISCW007739	59.3117	59.277	19.7215	0.82479	474.494		17.1987	0.825709	474.216
ISCW023310	59.7409	47.3905	0	0.299048	59.7409		0	0.299851	47.3905
ISCW015344	60.5128	72.2693	0	0.299048	60.5128		0	0.299851	72.2693
ISCW012450	61.5234	58.2498	72.9539	0.983257	615.234		71.5584	0.984206	582.498
ISCW019820	65.4093	59.3918	19.7215	0.82479	523.274		17.1987	0.825709	475.134
ISCW017362	66.8209	82.5871	0	0.299048	66.8209		0	0.299851	82.5871
ISCW023208	68.1512	93.3847	0	0.299048	68.1512		0	0.299851	93.3847
ISCW018150	70.7212	61.4981	2.65084	0.375182	141.442		2.29485	0.375986	122.996
ISCW008866	71.4647	96.3753	19.7215	0.82479	571.718		17.1987	0.825709	771.002
ISCW004287	76.5611	177.878	98.0852	1.06187	842.172		97.2657	1.06263	1956.66
ISCW001557	76.6753	79.4684	0	0.299048	76.6753		0	0.299851	79.4684
ISCW015396	81.1833	101.06	0	0.299048	81.1833		0	0.299851	101.06
ISCW008179	82.6429	73.5757	98.0852	1.06187	909.072		97.2657	1.06263	809.333
ISCW024874	92.0738	86.7374	2.71519	0.374451	184.148		2.35698	0.375265	173.475
ISCW019596	100.426	96.8874	0	0.299048	100.426		0	0.299851	96.8874
ISCW000655	101.855	81.1527	72.9539	0.983257	1018.55		71.5584	0.984206	811.527
ISCW000657	104.469	128.564	72.9539	0.983257	1044.69		71.5584	0.984206	1285.64
ISCW018137	104.864	80.0158	19.7215	0.82479	838.912		17.1987	0.825709	640.126
ISCW019287	111.303	96.1638	19.7215	0.82479	890.424		17.1987	0.825709	769.31
ISCW002130	114.638	128.07	13.8289	0.675274	687.828		12.0338	0.67615	768.42
ISCW007430	127.224	99.2395	19.7215	0.82479	1017.79		17.1987	0.825709	793.916
ISCW020673	129.838	113.107	0	0.299048	129.838		0	0.299851	113.107
ISCW020078	136.538	114.226	0	0.299048	136.538		0	0.299851	114.226
ISCW020307	137.72	128.087	0	0.299048	137.72		0	0.299851	128.087
ISCW003117	138.203	194.014	19.7215	0.82479	1105.62		17.1987	0.825709	1552.11
ISCW014707	144.636	141.608	19.7215	0.82479	1157.09		17.1987	0.825709	1132.86
ISCW004855	146.698	154.502	19.7215	0.82479	1173.58		17.1987	0.825709	1236.02
ISCW020382	149.453	170.408	19.7215	0.82479	1195.62		17.1987	0.825709	1363.26
ISCW020381	149.453	170.408	0	0.299048	149.453		0	0.299851	170.408
ISCW020380	149.453	170.408	0	0.299048	149.453		0	0.299851	170.408
ISCW014470	153.44	164.325	19.7215	0.82479	1227.52		17.1987	0.825709	1314.6
ISCW002952	160.47	126.055	72.9539	0.983257	1604.7		71.5584	0.984206	1260.55
ISCW011379	289.339	288.51	0	0.299048	289.339		0	0.299851	288.51
ISCW015581	305.47	283.646	62.1637	0.98701	3054.7		61.4951	0.983899	2836.46
ISCW005230	412.501	308.565	72.9539	0.983257	4125.01		71.5584	0.984206	3085.65
ISCW017579	454.662	388.978	0	0.299048	454.662		0	0.299851	388.978
ISCW009433	454.674	519.886	0	0.299048	454.674		0	0.299851	519.886
ISCW001128	476.628	407.404	158.506	1.16804	5719.54		158.398	1.15675	4888.85
ISCW000545	522.438	428.183	98.0852	1.06187	5746.82		97.2657	1.06263	4710.01
ISCW022655	546.68	425.185	0	0.299048	546.68		0	0.299851	425.185
ISCW012592	556.178	427.803	0	0.299048	556.178		0	0.299851	427.803
ISCW006277	689.946	556.937	0	0.299048	689.946		0	0.299851	556.937
ISCW007440	1943.97	1477.43	72.9539	0.983257	19439.7		71.5584	0.984206	14774.3
ISCW019219	2048.3	1903.31	0.771197	0.675742	14338.1		17.1987	0.825709	15226.5

## Sheet: Midgut
TF	Infected	Uninfected	BNC	PR	weighted degree		BNC	PR	weighted degree
ISCW012592	1672	1528	0	0.292907	1672		0	0.003378	1528
ISCW007440	979	1502	51.2535	0.995905	9790		59.7248	0.00365	15020
ISCW019219	740	478	15.1428	0.831607	5920		21.7679	0.003597	3824
ISCW001128	661	1330	363.501	1.29708	7932		385.972	0.003704	15960
ISCW016540	630	254	15.1428	0.831607	5040		21.7679	0.003597	2032
ISCW006277	615	583	0	0.292907	615		0	0.003378	583
ISCW022655	568	582	0	0.292907	568		0	0.003378	582
ISCW004234	507	270	51.2535	0.995905	5070		59.7248	0.00365	2700
ISCW000384	428	858	15.1428	0.831607	3424		21.7679	0.003597	6864
ISCW017579	360	184	0	0.292907	360		0	0.003378	184
ISCW015036	222	129	15.1428	0.831607	1776		21.7679	0.003597	1032
ISCW023283	186	111	0	0.292907	186		0	0.003378	111
ISCW020673	166	95	0	0.292907	166		0	0.003378	95
ISCW014470	166	126	15.1428	0.831607	1328		21.7679	0.003597	1008
ISCW019596	134	326	0	0.292907	134		0	0.003378	326
ISCW020307	132	127	0	0.292907	132		0	0.003378	127
ISCW017362	128	49	0	0.292907	128		0	0.003378	49
ISCW004855	118	219	15.1428	0.831607	944		21.7679	0.003597	1752
ISCW021579	111	156	15.1428	0.831607	888		21.7679	0.003597	1248
ISCW008923	106	114	15.1428	0.831607	848		21.7679	0.003597	912
ISCW018137	101	188	15.1428	0.831607	808		21.7679	0.003597	1504
ISCW002130	81	99	10.4852	0.678377	486		15.1564	0.003546	594
ISCW015581	81	78	91.9512	1.01835	810		102.291	0.00365	780
ISCW000010	79	51	15.1428	0.831607	632		21.7679	0.003597	408
ISCW012450	77	63	51.2535	0.995905	770		59.7248	0.00365	630
ISCW005790	74	116	0	0.292907	74		0	0.003378	116
ISCW022115	72	247	0	0.292907	72		0	0.003378	247
ISCW000545	71	121	89.3892	1.08707	781		99.5747	0.003676	1331
ISCW007431	70	110	15.1428	0.831607	560		21.7679	0.003597	880
ISCW018168	69	13	0	0.292907	69		0	0.003378	13
ISCW023474	64	21	91.9512	1.01835	640		102.291	0.00365	210
ISCW007299	59	31	15.1428	0.831607	472		21.7679	0.003597	248
ISCW024874	56	61	1.98945	0.370503	112		2.95187	0.003448	122
ISCW010253	55	67	15.1428	0.831607	440		21.7679	0.003597	536
ISCW007739	52	74	15.1428	0.831607	416		21.7679	0.003597	592
ISCW018150	51	35	1.98868	0.370565	102		2.9065	0.003448	70
ISCW002952	51	95	51.2535	0.995905	510		59.7248	0.00365	950
ISCW005631	50	87	15.1428	0.831607	400		21.7679	0.003597	696
ISCW020078	45	80	0	0.292907	45		0	0.003378	80
ISCW019222	44	65	15.1428	0.831607	352		21.7679	0.003597	520
ISCW008375	42	74	0	0.292907	42		0	0.003378	74
ISCW000657	38	13	51.2535	0.995905	380		59.7248	0.00365	130
ISCW003976	37	56	0	0.292907	37		0	0.003378	56
ISCW011188	34	12	15.1428	0.831607	272		21.7679	0.003597	96
ISCW021939	34	11	15.1428	0.831607	272		21.7679	0.003597	88
ISCW017872	33	6	0	0.292907	33		0	0.003378	6
ISCW000718	32	37	12.7838	0.753949	224		18.4694	0.003571	259
ISCW008866	32	24	15.1428	0.831607	256		21.7679	0.003597	192
ISCW018997	31	10	0	0.292907	31		0	0.003378	10
ISCW023000	30	8	15.1428	0.831607	240		21.7679	0.003597	64
ISCW021323	29	21	15.1428	0.831607	232		21.7679	0.003597	168
ISCW022584	28	47	0	0.292907	28		0	0.003378	47
ISCW021143	28	3	0	0.292907	28		0	0.003378	3
ISCW000457	27	8	0	0.292907	27		0	0.003378	8
ISCW020204	27	17	0	0.292907	27		0	0.003378	17
ISCW015344	26	10	0	0.292907	26		0	0.003378	10
ISCW001557	26	94	0	0.292907	26		0	0.003378	94
ISCW017801	25	3	0	0.292907	25		0	0.003378	3
ISCW004924	23	28	0	0.292907	23		0	0.003378	28
ISCW023310	22	155	0	0.292907	22		0	0.003378	155
ISCW011796	21	10	51.2535	0.995905	210		59.7248	0.00365	100
ISCW023432	19	29	0	0.292907	19		0	0.003378	29
ISCW016455	18	2	0	0.292907	18		0	0.003378	2
ISCW013570	18	28	0	0.292907	18		0	0.003378	28
ISCW007296	18	32	0	0.292907	18		0	0.003378	32
ISCW023060	17	6	0	0.292907	17		0	0.003378	6
ISCW021770	17	16	0	0.292907	17		0	0.003378	16
ISCW003256	15	57	15.1428	0.831607	120		21.7679	0.003597	456
ISCW000140	15	7	51.2535	0.995905	150		59.7248	0.00365	70
ISCW023999	15	5	0	0.292907	15		0	0.003378	5
ISCW016614	14	13	15.1428	0.831607	112		21.7679	0.003597	104
ISCW023657	13	2	0	0.292907	13		0	0.003378	2
ISCW017122	12	2	15.1428	0.831607	96		21.7679	0.003597	16
ISCW018164	11	7	15.1428	0.831607	88		21.7679	0.003597	56
ISCW018935	11	5	51.2535	0.995905	110		59.7248	0.00365	50
ISCW012531	11	5	0	0.292907	11		0	0.003378	5
ISCW023208	11	19	0	0.292907	11		0	0.003378	19
ISCW000655	11	5	51.2535	0.995905	110		59.7248	0.00365	50
ISCW000551	10	4	10.4689	0.677438	60		15.0734	0.003546	24
ISCW019692	10	0	15.1428	0.831607	80
ISCW002976	10	12	91.9512	1.01835	100		102.291	0.00365	120
ISCW006276	10	5	0	0.292907	10		0	0.003378	5
ISCW023660	9	1	51.2535	0.995905	90		59.7248	0.00365	10
ISCW008805	9	10	15.1428	0.831607	72		21.7679	0.003597	80
ISCW012210	9	9	0	0.292907	9		0	0.003378	9
ISCW007968	8	6	0	0.292907	8		0	0.003378	6
ISCW000227	8	10	15.1428	0.831607	64		21.7679	0.003597	80
ISCW022714	8	10	0	0.292907	8		0	0.003378	10
ISCW020450	8	6	15.1428	0.831607	64		21.7679	0.003597	48
ISCW014707	8	9	15.1428	0.831607	64		21.7679	0.003597	72
ISCW002484	7	2	15.1428	0.831607	56		21.7679	0.003597	16
ISCW017749	7	4	15.1428	0.831607	56		21.7679	0.003597	32
ISCW022843	7	2	0	0.292907	7		0	0.003378	2
ISCW020472	6	15	0	0.292907	6		0	0.003378	15
ISCW022440	5	3	0	0.292907	5		0	0.003378	3
ISCW003529	5	2	0	0.292907	5		0	0.003378	2
ISCW006922	5	4	0	0.292907	5		0	0.003378	4
ISCW017821	5	1	15.1428	0.831607	40		21.7679	0.003597	8
ISCW019520	4	0	0	0.292907	4
ISCW010061	4	0	0	0.292907	4
ISCW020381	4	3	0	0.292907	4		0	0.003378	3
ISCW024501	3	0	91.9512	1.01835	30
ISCW003737	3	0	0	0.292907	3
ISCW007430	3	4	15.1428	0.831607	24		21.7679	0.003597	32
ISCW011379	3	4	0	0.292907	3		0	0.003378	4
ISCW021042	2	2	0	0.292907	2		0	0.003378	2
ISCW019280	2	0	15.1428	0.831607	16
ISCW011795	2	2	0	0.292907	2		0	0.003378	2
ISCW019861	2	3	0	0.292907	2		0	0.003378	3
ISCW008081	1	3	15.1428	0.831607	8		21.7679	0.003597	24
ISCW024416	1	0	0	0.292907	1
ISCW007030	1	0	0	0.292907	1
ISCW014989	1	0	0	0.292907	1
ISCW009030	1	0	15.1428	0.831607	8
ISCW016268	1	2	91.9512	1.01835	10		102.291	0.00365	20
ISCW015741	1	0	15.1428	0.831607	8
ISCW023842	1	0	0	0.292907	1
ISCW009436	1	0	0	0.292907	1
ISCW019283	1	0	15.1428	0.831607	8
ISCW013477	1	0	15.1428	0.831607	8
ISCW004287	1	0	89.3892	1.08707	11
ISCW015396	1	4	0	0.292907	1		0	0.003378	4
ISCW007308	0	7					0	0.003378	7
ISCW013821	0	25					0	0.003378	25
ISCW020498	0	1					0	0.003378	1
ISCW015766	0	1					0	0.003378	1
ISCW018799	0	2					21.7679	0.003597	16
ISCW018031	0	2					0	0.003378	2
ISCW002341	0	2					0	0.003378	2
ISCW014430	0	1					0	0.003378	1
ISCW005223	0	3					0	0.003378	3
ISCW003694	0	1					0	0.003378	1
ISCW012145	0	1					0	0.003378	1
ISCW010095	0	1					0	0.003378	1
ISCW021517	0	1					0	0.003378	1
ISCW012211	0	7					15.0734	0.003546	42
ISCW017832	0	3					102.291	0.00365	30
ISCW015893	0	1					0	0.003378	1
ISCW008179	0	3					99.5747	0.003676	33
ISCW019287	0	1					21.7679	0.003597	8
ISCW003117	0	1					21.7679	0.003597	8
ISCW020382	0	1					279.134	0.002451	8
ISCW020380	0	3					0	0.003378	3

## Sheet: Salivary glands
TF	Infected	Uninfected	BNC	PR	weighted degree		BNC	PR	weighted degree
ISCW010324	1	0	15.7855	0.843251	8
ISCW008081	10	1	15.7855	0.843251	80		16.5058	0.871829	8
ISCW024501	0	2					93.913	1.07926	20
ISCW007308	0	1					0	0.299376	1
ISCW021026	1	0	56.9228	0.94018	9
ISCW008920	1	1	0	0.295641	1		0	0.299376	1
ISCW006493	4	0	0	0.295641	4
ISCW007030	7	7	0	0.295641	7		0	0.299376	7
ISCW018799	2	0	15.7855	0.843251	16
ISCW016573	8	1	0	0.295641	8		0	0.299376	1
ISCW021090	1	0	0	0.295641	1
ISCW021042	1	0	0	0.295641	1
ISCW002341	1	1	0	0.295641	1		0	0.299376	1
ISCW011969	1	0	57.2191	0.939091	9
ISCW017801	1	1	0	0.295641	1		0	0.299376	1
ISCW002484	2	0	15.7855	0.843251	16
ISCW003694	3	0	0	0.295641	3
ISCW023660	6	0	55.2514	1.01164	60
ISCW023657	1	1	0	0.295641	1		0	0.299376	1
ISCW019520	5	0	0	0.295641	5
ISCW003256	12	6	15.7855	0.843251	96		16.5058	0.871829	48
ISCW021080	1	0	0	0.295641	1
ISCW007968	2	0	0	0.295641	2
ISCW000227	13	1	15.7855	0.843251	104		16.5058	0.871829	8
ISCW016455	3	1	0	0.295641	3		0	0.299376	1
ISCW011188	13	3	15.7855	0.843251	104		16.5058	0.871829	24
ISCW000457	9	2	0	0.295641	9		0	0.299376	2
ISCW017749	2	0	15.7855	0.843251	16
ISCW000551	6	2	10.8122	0.686633	36		11.3094	0.707895	12
ISCW020472	3	1	0	0.295641	3		0	0.299376	1
ISCW010061	1	0	0	0.295641	1
ISCW019692	1	0	15.7855	0.843251	8
ISCW013570	9	1	0	0.295641	9		0	0.299376	1
ISCW008805	14	2	15.7855	0.843251	112		16.5058	0.871829	16
ISCW021054	1	0	0	0.295641	1
ISCW022714	4	7	0	0.295641	4		0	0.299376	7
ISCW015036	81	25	15.7855	0.843251	648		16.5058	0.871829	200
ISCW022115	58	28	0	0.295641	58		0	0.299376	28
ISCW003529	8	0	0	0.295641	8
ISCW019283	1	0	15.7855	0.843251	8
ISCW019280	3	0	15.7855	0.843251	24
ISCW011796	11	0	55.2514	1.01164	110
ISCW011795	1	1	0	0.295641	1		0	0.299376	1
ISCW021939	1	0	15.7855	0.843251	8
ISCW012211	1	0	10.8122	0.686633	6
ISCW012210	2	0	0	0.295641	2
ISCW023060	5	2	0	0.295641	5		0	0.299376	2
ISCW017122	2	2	15.7855	0.843251	16		16.5058	0.871829	16
ISCW000140	2	0	55.2514	1.01164	20
ISCW018164	4	2	15.7855	0.843251	32		16.5058	0.871829	16
ISCW021770	3	3	0	0.295641	3		0	0.299376	3
ISCW023000	5	2	15.7855	0.843251	40		16.5058	0.871829	16
ISCW005790	27	10	0	0.295641	27		0	0.299376	10
ISCW023999	2	0	0	0.295641	2
ISCW019861	1	0	0	0.295641	1
ISCW002976	7	1	99.0445	1.03602	70		93.913	1.07926	10
ISCW020450	0	1					16.5058	0.871829	8
ISCW023432	9	4	0	0.295641	9		0	0.299376	4
ISCW002346	1	0	0	0.295641	1
ISCW017832	5	0	99.0445	1.03602	50
ISCW007299	40	6	15.7855	0.843251	320		16.5058	0.871829	48
ISCW022843	3	2	0	0.295641	3		0	0.299376	2
ISCW018935	2	1	55.2514	1.01164	20		57.5689	1.05378	10
ISCW010253	15	8	15.7855	0.843251	120		16.5058	0.871829	64
ISCW018997	8	1	0	0.295641	8		0	0.299376	1
ISCW000718	9	4	13.3394	0.764284	63		13.8811	0.789101	28
ISCW021579	67	20	15.7855	0.843251	536		16.5058	0.871829	160
ISCW008375	31	13	0	0.295641	31		0	0.299376	13
ISCW015893	1	0	0	0.295641	1
ISCW007431	38	5	15.7855	0.843251	304		16.5058	0.871829	40
ISCW020204	10	2	0	0.295641	10		0	0.299376	2
ISCW004924	7	5	0	0.295641	7		0	0.299376	5
ISCW007296	1	2	0	0.295641	1		0	0.299376	2
ISCW005631	18	8	15.7855	0.843251	144		16.5058	0.871829	64
ISCW008923	66	42	15.7855	0.843251	528		16.5058	0.871829	336
ISCW017821	1	0	15.7855	0.843251	8
ISCW017872	22	3	0	0.295641	22		0	0.299376	3
ISCW004234	151	38	55.2514	1.01164	1510		57.5689	1.05378	380
ISCW003976	23	9	0	0.295641	23		0	0.299376	9
ISCW023474	15	2	99.0445	1.03602	150		93.913	1.07926	20
ISCW019222	36	13	15.7855	0.843251	288		16.5058	0.871829	104
ISCW022584	11	6	0	0.295641	11		0	0.299376	6
ISCW000384	232	58	15.7855	0.843251	1856		16.5058	0.871829	464
ISCW021143	4	0	0	0.295641	4
ISCW000010	31	18	15.7855	0.843251	248		16.5058	0.871829	144
ISCW006276	3	4	0	0.295641	3		0	0.299376	4
ISCW016540	118	35	15.7855	0.843251	944		16.5058	0.871829	280
ISCW018168	6	4	0	0.295641	6		0	0.299376	4
ISCW012531	0	1					0	0.299376	1
ISCW016614	9	2	15.7855	0.843251	72		16.5058	0.871829	16
ISCW023283	121	17	0	0.295641	121		0	0.299376	17
ISCW007739	36	16	15.7855	0.843251	288		16.5058	0.871829	128
ISCW023310	9	11	0	0.295641	9		0	0.299376	11
ISCW015344	3	3	0	0.295641	3		0	0.299376	3
ISCW012450	29	8	55.2514	1.01164	290		57.5689	1.05378	80
ISCW017362	48	24	0	0.295641	48		0	0.299376	24
ISCW023208	36	7	0	0.295641	36		0	0.299376	7
ISCW018150	19	3	2.05533	0.374608	38		2.11817	0.382103	6
ISCW008866	16	7	15.7855	0.843251	128		16.5058	0.871829	56
ISCW001557	10	9	0	0.295641	10		0	0.299376	9
ISCW015396	1	0	0	0.295641	1
ISCW024874	49	17	2.09657	0.37448	98		2.11922	0.382018	34
ISCW019596	33	25	0	0.295641	33		0	0.299376	25
ISCW000655	7	1	55.2514	1.01164	70		57.5689	1.05378	10
ISCW000657	25	2	55.2514	1.01164	250		57.5689	1.05378	20
ISCW018137	72	23	15.7855	0.843251	576		16.5058	0.871829	184
ISCW019287	1	1	15.7855	0.843251	8		16.5058	0.871829	8
ISCW002130	43	17	10.8947	0.687526	258		11.3284	0.709157	102
ISCW020673	77	43	0	0.295641	77		0	0.299376	43
ISCW020078	48	24	0	0.295641	48		0	0.299376	24
ISCW020307	128	42	0	0.295641	128		0	0.299376	42
ISCW014707	4	5	15.7855	0.843251	32		16.5058	0.871829	40
ISCW004855	35	19	15.7855	0.843251	280		16.5058	0.871829	152
ISCW020382	1	0	15.7855	0.843251	8
ISCW020381	1	2	0	0.295641	1		0	0.299376	2
ISCW014470	28	6	15.7855	0.843251	224		16.5058	0.871829	48
ISCW002952	13	14	55.2514	1.01164	130		57.5689	1.05378	140
ISCW011379	0	1					0	0.299376	1
ISCW015581	48	12	99.0445	1.03602	480		93.913	1.07926	120
ISCW017579	122	55	0	0.295641	122		0	0.299376	55
ISCW001128	494	146	367.467	1.31526	5928		308.753	1.368	1752
ISCW000545	43	16	101.838	1.10748	473		101.188	1.15686	176
ISCW022655	382	148	0	0.295641	382		0	0.299376	148
ISCW012592	636	302	0	0.295641	636		0	0.299376	302
ISCW006277	292	119	0	0.295641	292		0	0.299376	119
ISCW007440	1160	247	55.2514	1.01164	11600		57.5689	1.05378	2470
ISCW019219	296	82	15.7855	0.843251	2368		16.5058	0.871829	656

## Sheet: Column description
ID	Identifier for the Ixodes scapuaris sequence (GenBank accession)
Infected	Expression of the ID infected cells, midgut or salivary glands
Uninfected	Expression of the ID uninfected cells, midgut or salivary glands
BNC	Betwenness centrality of the node in the network				Blue color mean for infected cells or organs
PR	PageRank of the node in the network
weighted degree	The weigthed degree of the node in the network
BNC	Betwenness centrality of the node in the network				Green color mean for uninfected cells or organs
PR	PageRank of the node in the network
weighted degree	The weigthed degree of the node in the network
